# Supplementary material
Source: HighWire-hosted journal article supplement (https://erj.ersjournals.com/content/59/2/2100185)
Supplement: inline-supplementary-material-10 [file inline-supplementary-material-10.pdf]

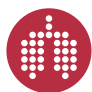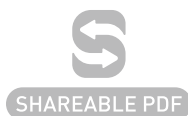

# Treatment of cystic fibrosis airway cells with CFTR modulators reverses aberrant mucus properties *via* hydration

Cameron B. Morrison <sup>1</sup>, Kendall M. Shaffer<sup>1</sup>, Kenza C. Araba<sup>1</sup>, Matthew R. Markovetz<sup>1</sup>, Jason A. Wykoff<sup>1</sup>, Nancy L. Quinney<sup>1</sup>, Shuyu Hao<sup>2</sup>, Martial F. Delion<sup>1</sup>, Alexis L. Flen<sup>1</sup>, Lisa C. Morton<sup>1</sup>, Jimmy Liao<sup>1</sup>, David B. Hill<sup>1,3</sup>, Mitchell L. Drumm<sup>4</sup>, Wanda K. O'Neal<sup>1</sup>, Mehmet Kesimer<sup>1</sup>, Martina Gentzsch<sup>1,2,5</sup> and Camille Ehre<sup>1,5</sup>

<sup>1</sup>Marsico Lung Institute/CF Center, The University of North Carolina at Chapel Hill, Chapel Hill, NC, USA. <sup>2</sup>Dept of Cell Biology and Physiology, The University of North Carolina at Chapel Hill, Chapel Hill, NC, USA. <sup>3</sup>Dept of Physics and Astronomy, The University of North Carolina at Chapel Hill, Chapel Hill, NC, USA. <sup>4</sup>Dept of Genetics and Genome Sciences, Case Western Reserve University School of Medicine, Cleveland, OH, USA. <sup>5</sup>Division of Pediatric Pulmonology, The University of North Carolina at Chapel Hill, Chapel Hill, NC, USA.

Corresponding author: Camille Ehre ([camille\\_ehre@med.unc.edu](mailto:camille_ehre@med.unc.edu))

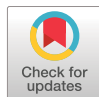

Shareable abstract (@ERSpublications)

**CFTR rescue failed to normalise acidic pH, but reduced mucin concentration. Extended rehydration, not pH adjustment, facilitated mucus removal from cell surfaces, suggesting that mucus hydration is the dominant biochemical change in CF airways.** <https://bit.ly/3iKUzFd>

**Cite this article as:** Morrison CB, Shaffer KM, Araba KC, *et al.* Treatment of cystic fibrosis airway cells with CFTR modulators reverses aberrant mucus properties *via* hydration. *Eur Respir J* 2022; 59: 2100185 [DOI: 10.1183/13993003.00185-2021].

This single-page version can be shared freely online.

Copyright ©The authors 2022. For reproduction rights and permissions contact [permissions@ersnet.org](mailto:permissions@ersnet.org)

Received: 20 Jan 2021  
Accepted: 11 June 2021

## Abstract

**Question** Cystic fibrosis (CF) is characterised by the accumulation of viscous adherent mucus in the lungs. While several hypotheses invoke a direct relationship with cystic fibrosis transmembrane conductance regulator (CFTR) dysfunction (*i.e.* acidic airway surface liquid (ASL) pH, low bicarbonate ( $\text{HCO}_3^-$ ) concentration, airway dehydration), the dominant biochemical alteration of CF mucus remains unknown.

**Materials/methods** We characterised a novel cell line (CFTR-KO Calu3 cells) and the responses of human bronchial epithelial (HBE) cells from subjects with G551D or F508del mutations to ivacaftor and elexacaftor-tezacaftor-ivacaftor. A spectrum of assays such as short-circuit currents, quantitative PCR, ASL pH, Western blotting, light scattering/refractometry (size-exclusion chromatography with inline multi-angle light scattering), scanning electron microscopy, percentage solids and particle tracking were performed to determine the impact of CFTR function on mucus properties.

**Results** Loss of CFTR function in Calu3 cells resulted in ASL pH acidification and mucus hyperconcentration (dehydration). Modulation of CFTR in CF HBE cells did not affect ASL pH or mucin mRNA expression, but decreased mucus concentration, relaxed mucus network ultrastructure and improved mucus transport. In contrast with modulator-treated cells, a large fraction of airway mucins remained attached to naïve CF cells following short apical washes, as revealed by the use of reducing agents to remove residual mucus from the cell surfaces. Extended hydration, but not buffers alkalised with sodium hydroxide or  $\text{HCO}_3^-$ , normalised mucus recovery to modulator-treated cell levels.

**Conclusion** These results indicate that airway dehydration, not acidic pH and/or low  $[\text{HCO}_3^-]$ , is responsible for abnormal mucus properties in CF airways and CFTR modulation predominantly restores normal mucin entanglement.
